# Supplementary material
Source: ML conference proceedings conference paper supplement (https://openreview.net/forum?id=BfO6od6JD6)

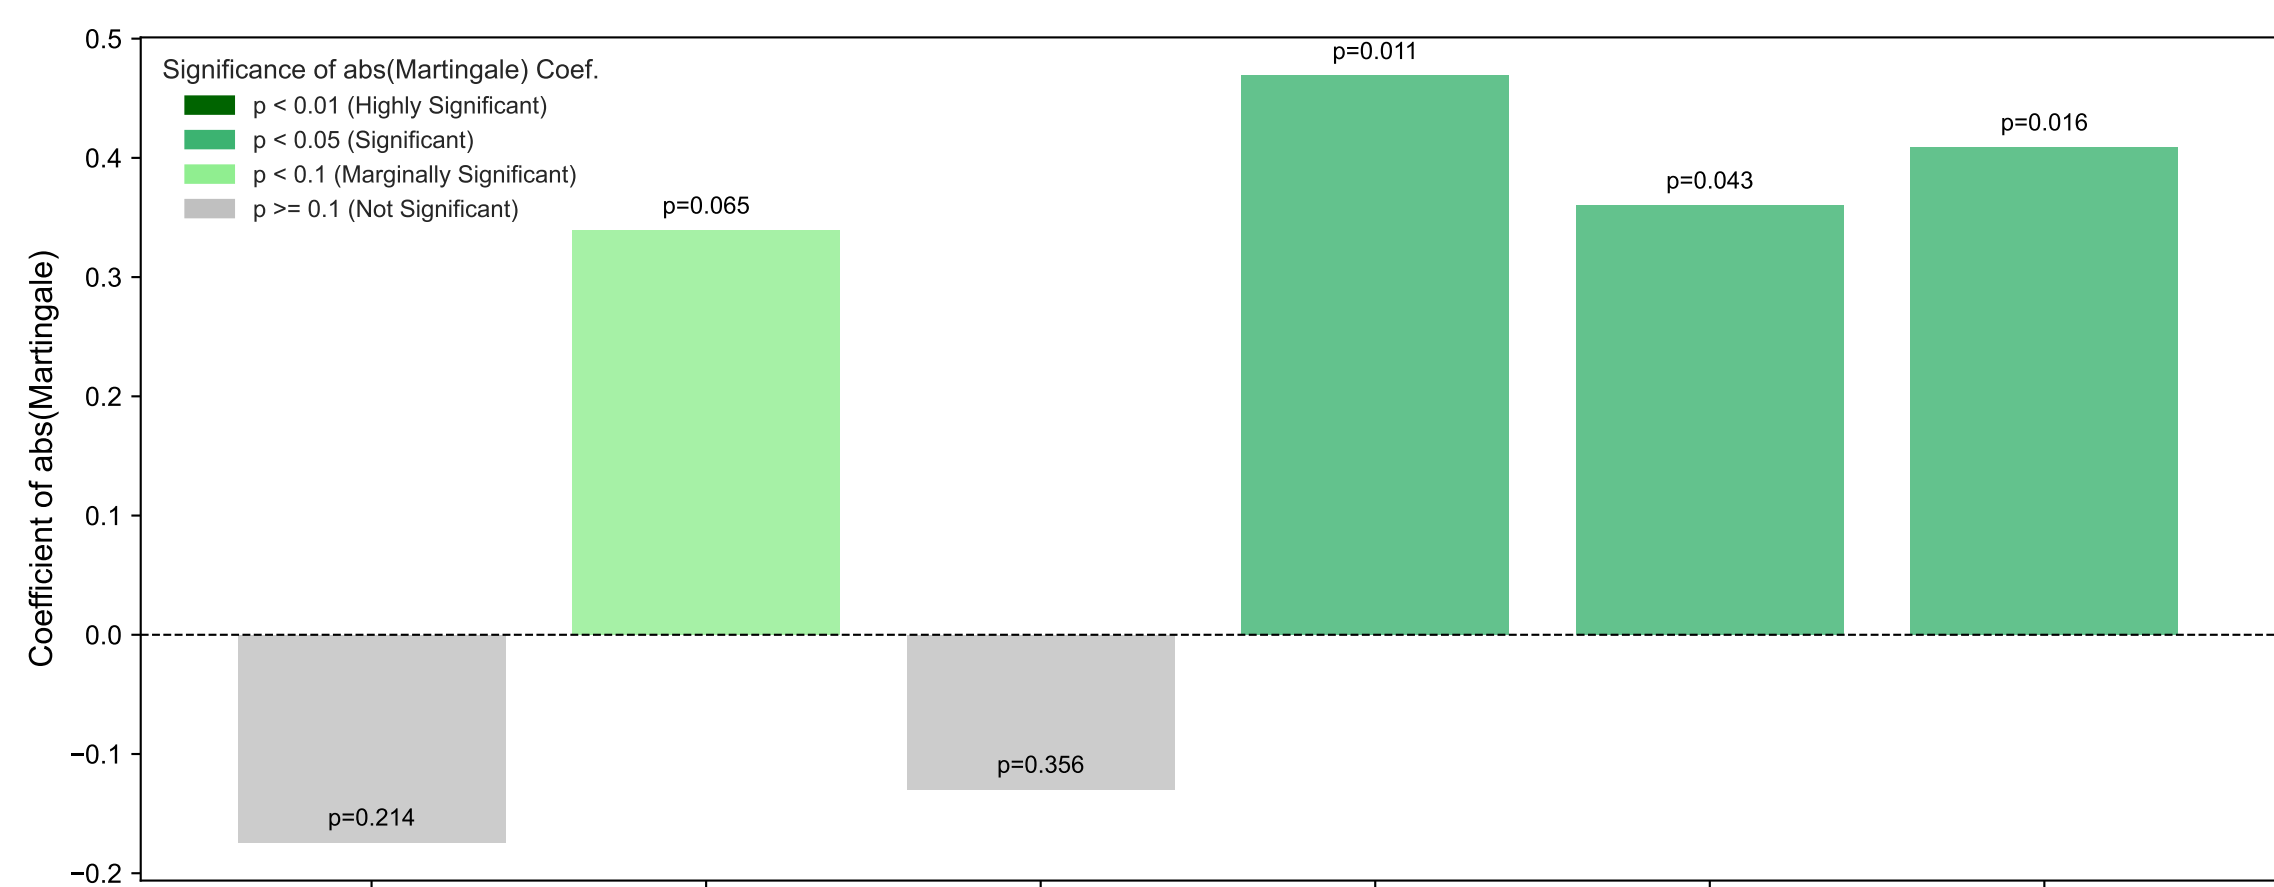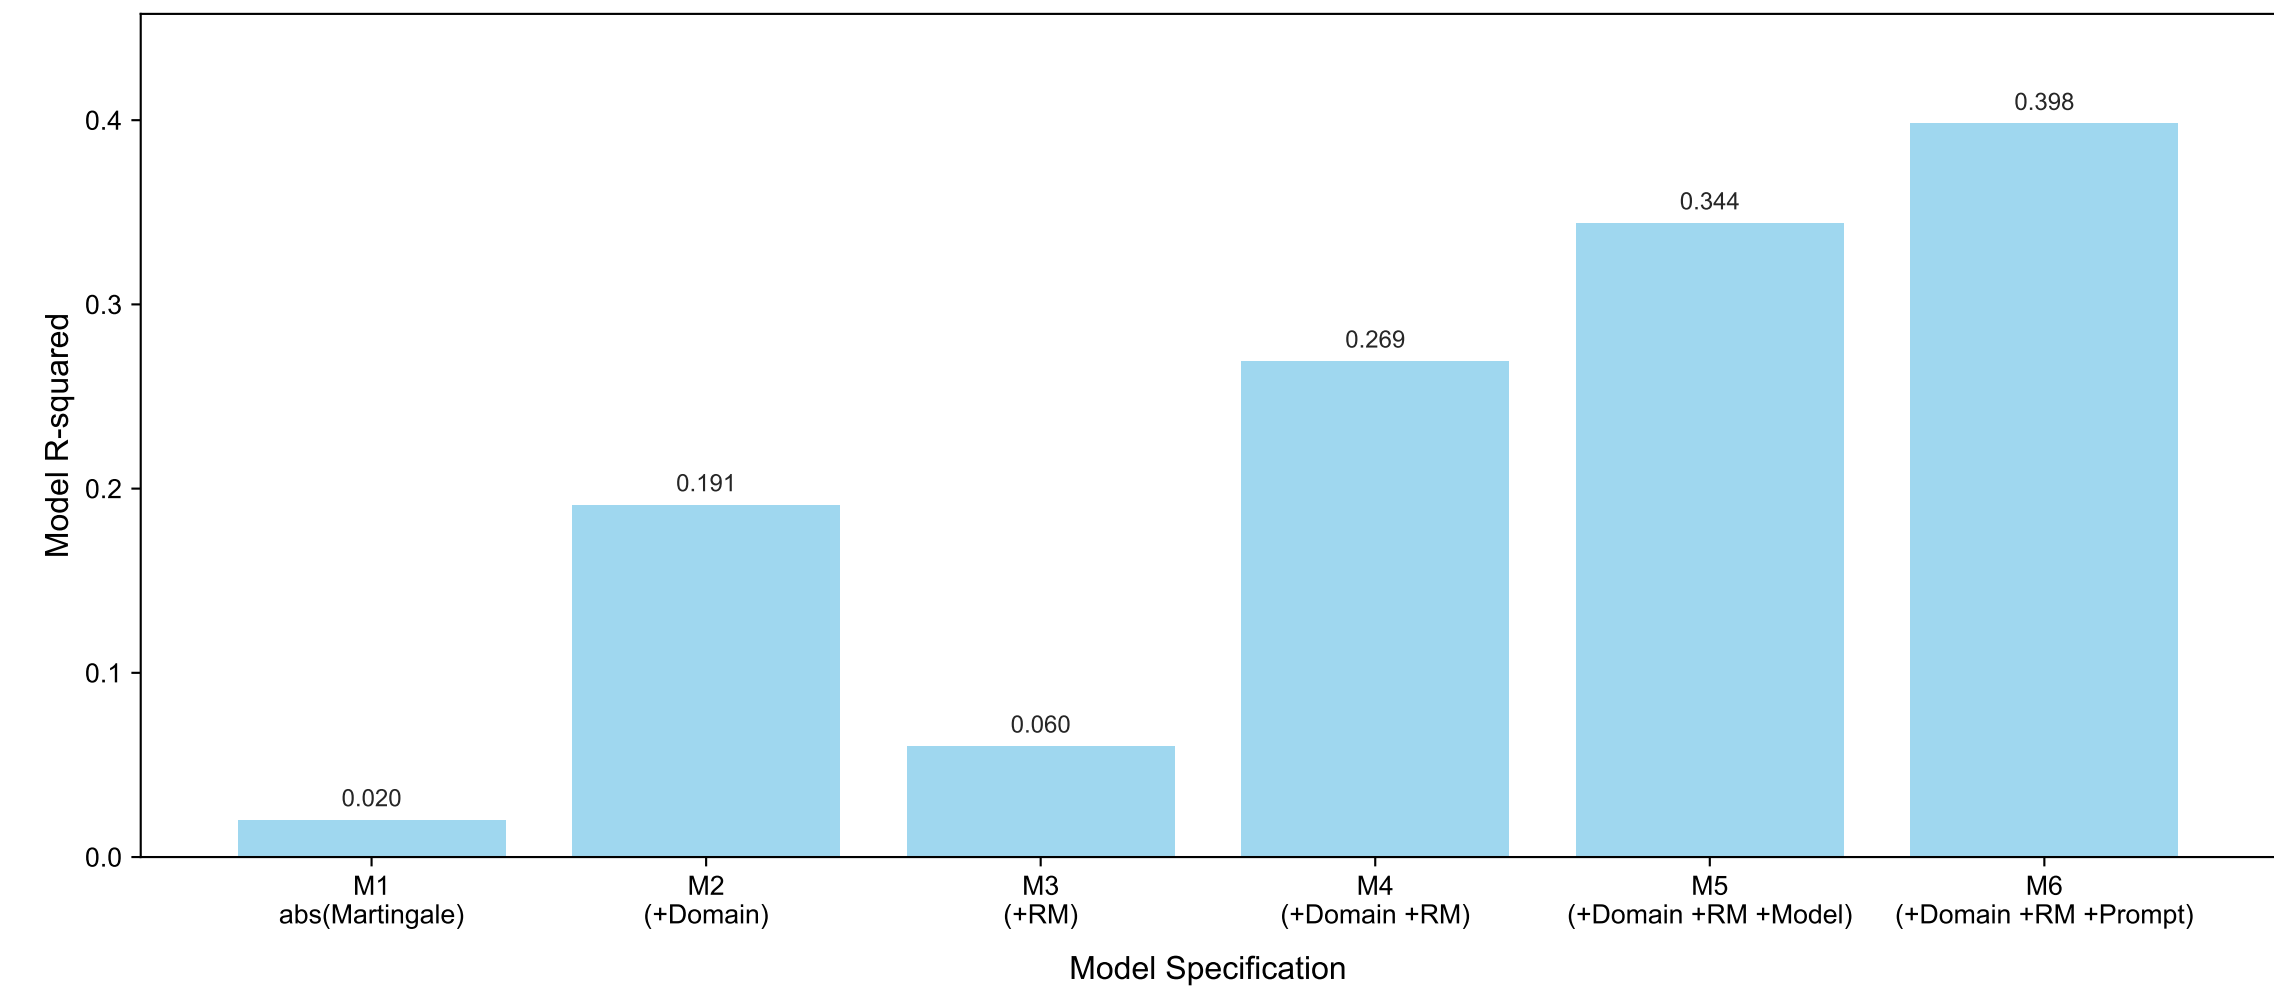

Supplement: supplementary_material [file accuracy_regression.pdf › Eval-Reasoning-Consistency-main/data/figures/per_step/accuracy_regression.pdf]

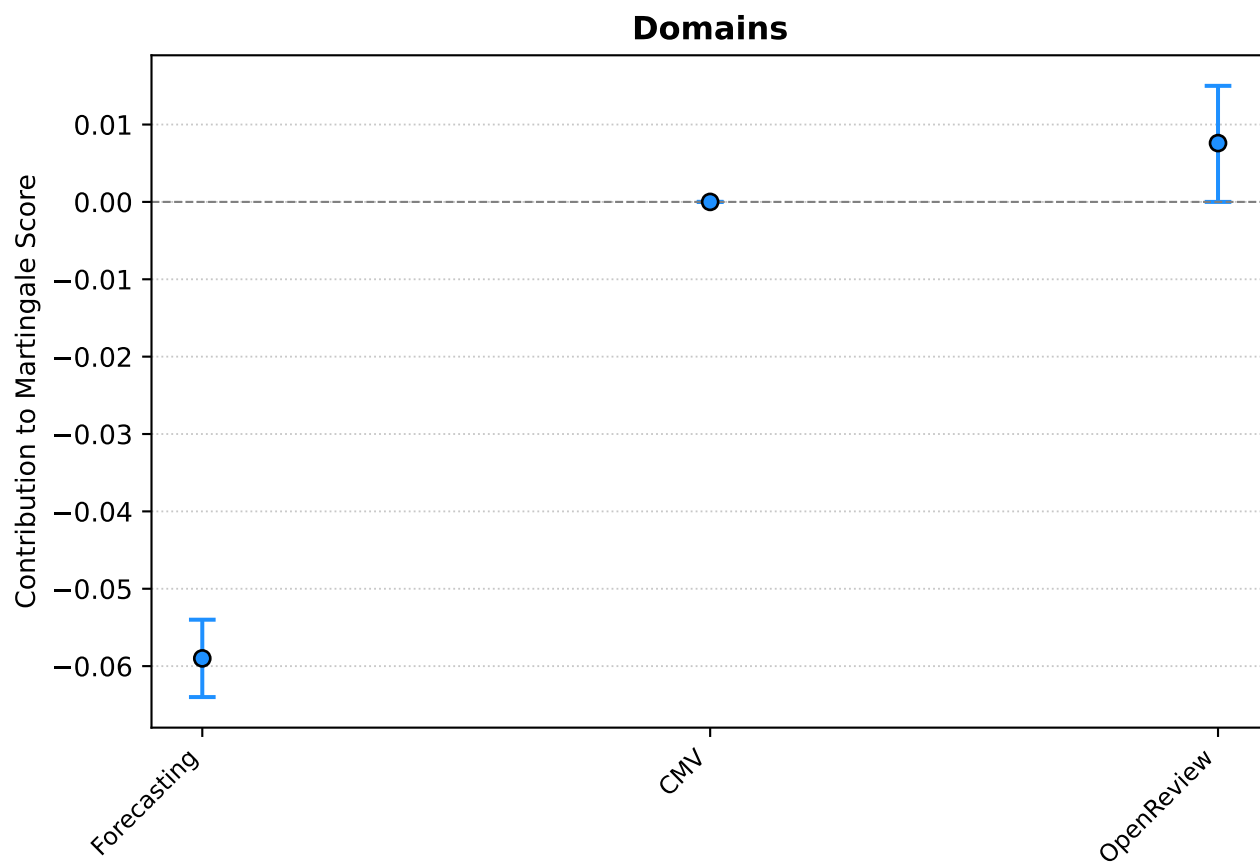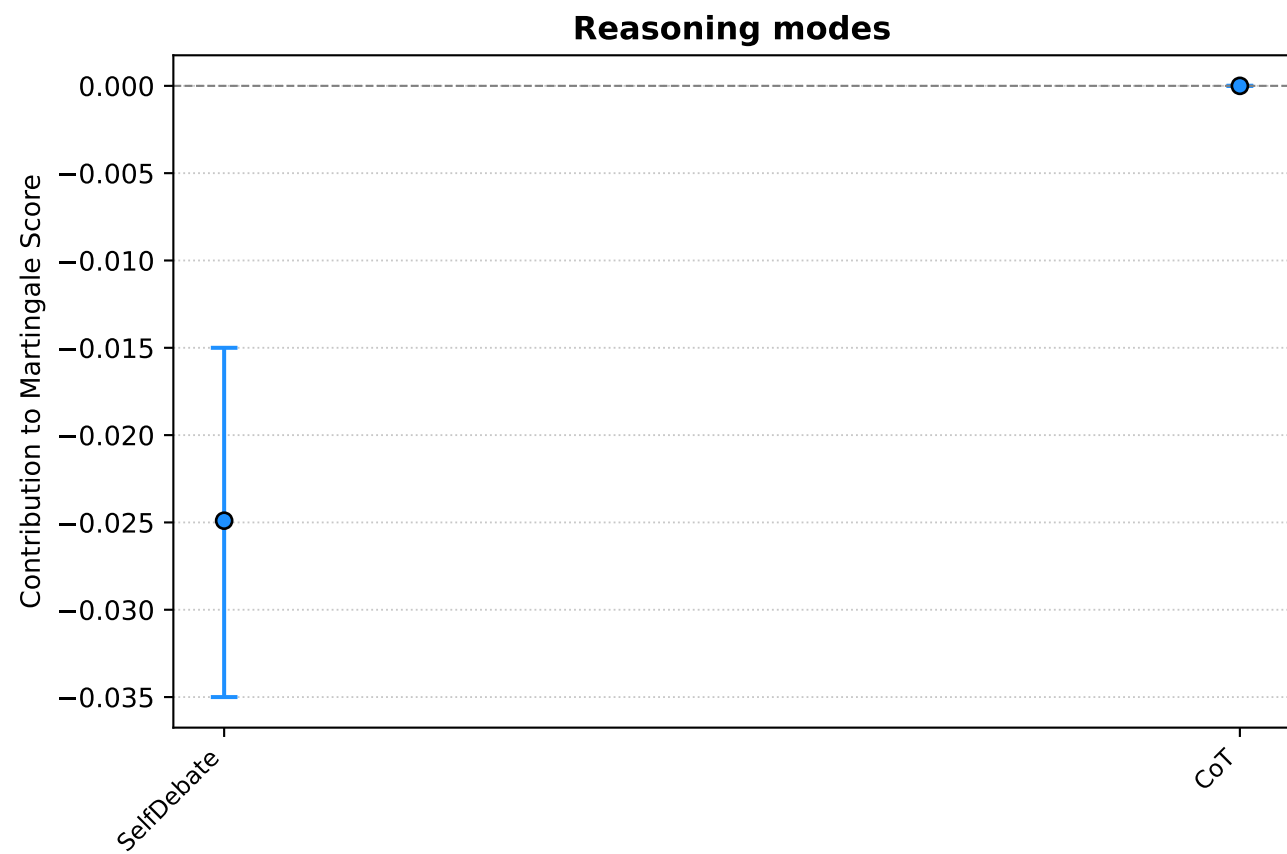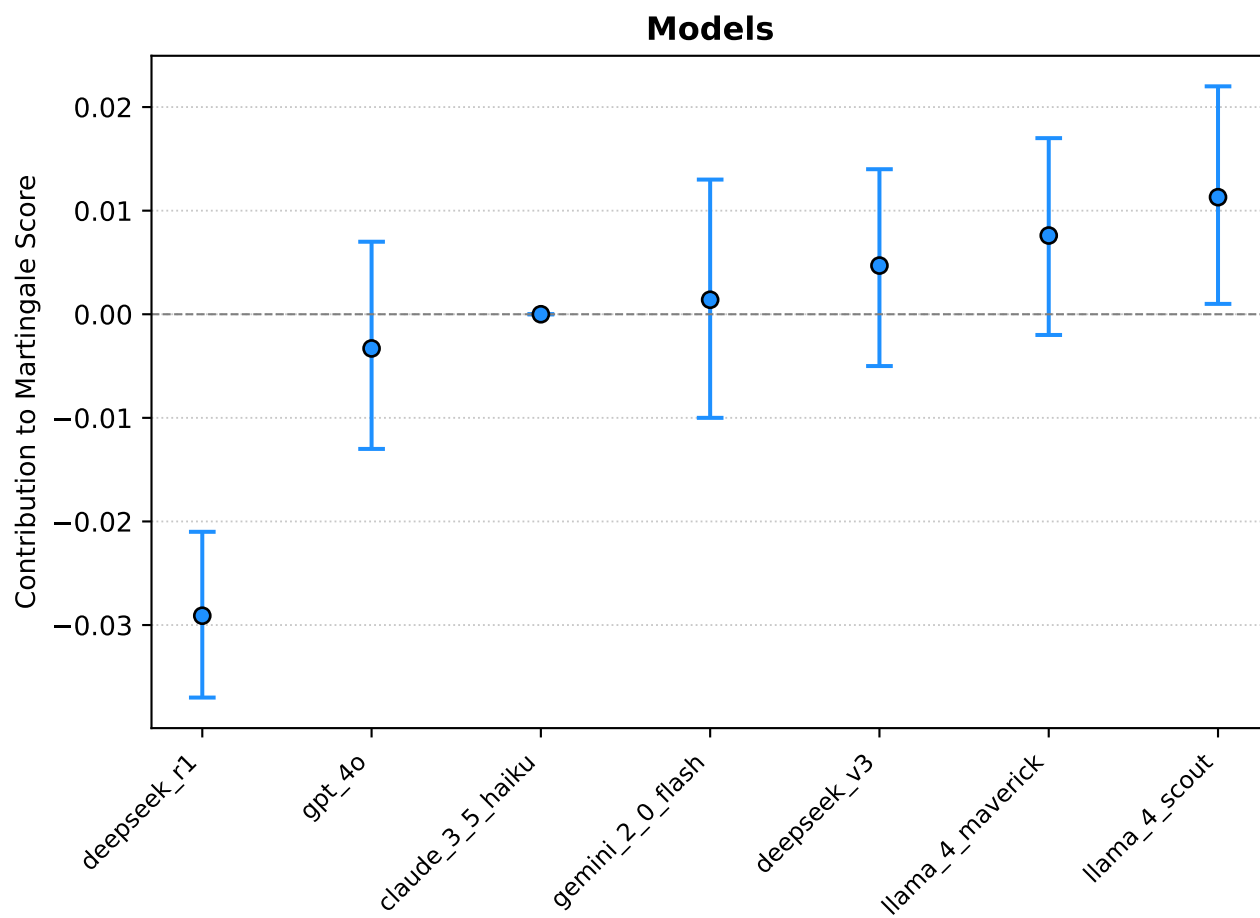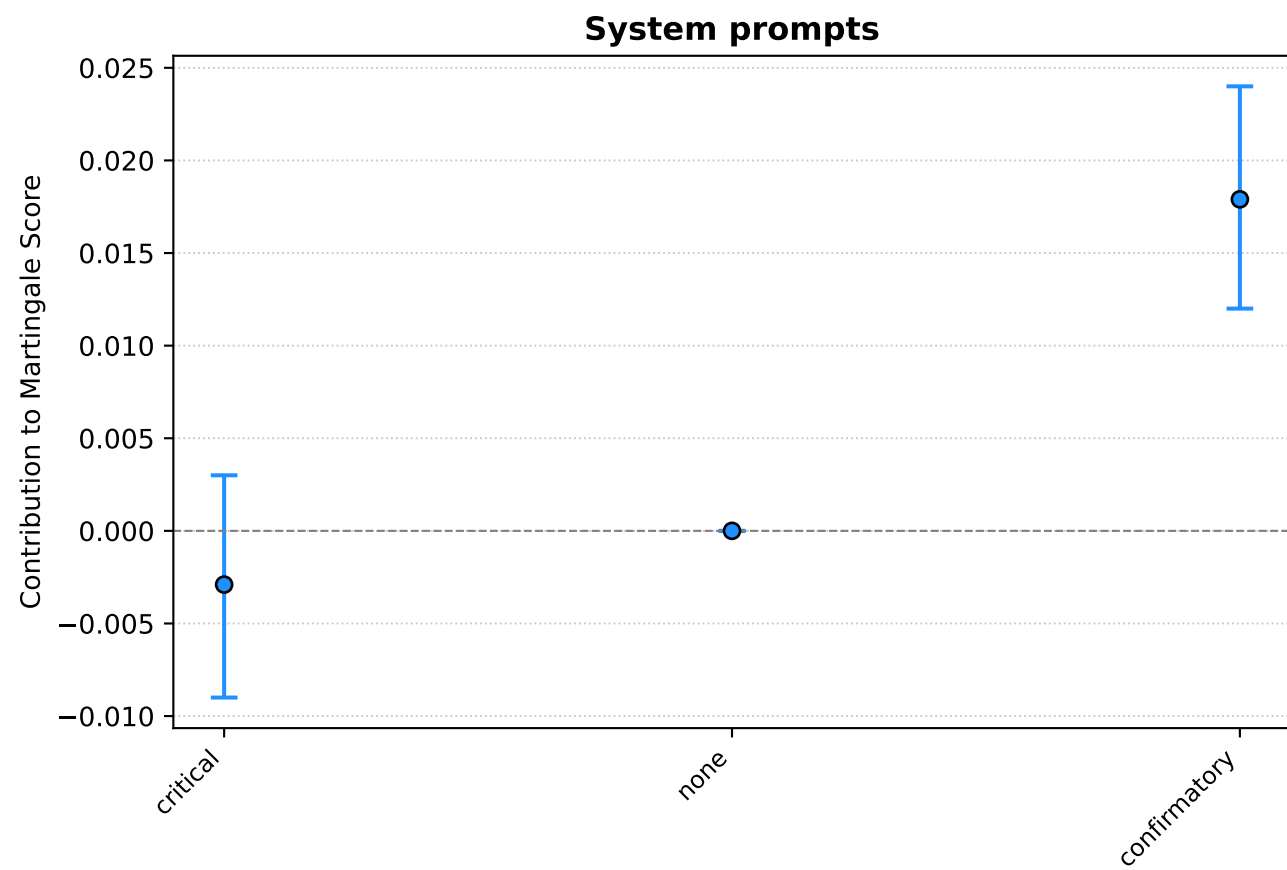

Supplement: supplementary_material [file causal_attribution_coefficients.pdf › Eval-Reasoning-Consistency-main/data/figures/per_step/causal_attribution_coefficients.pdf]

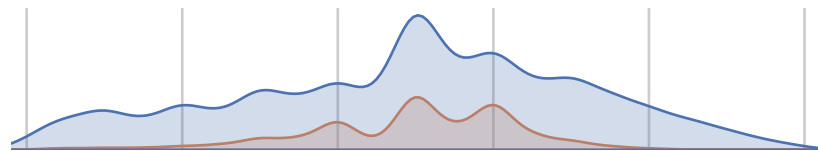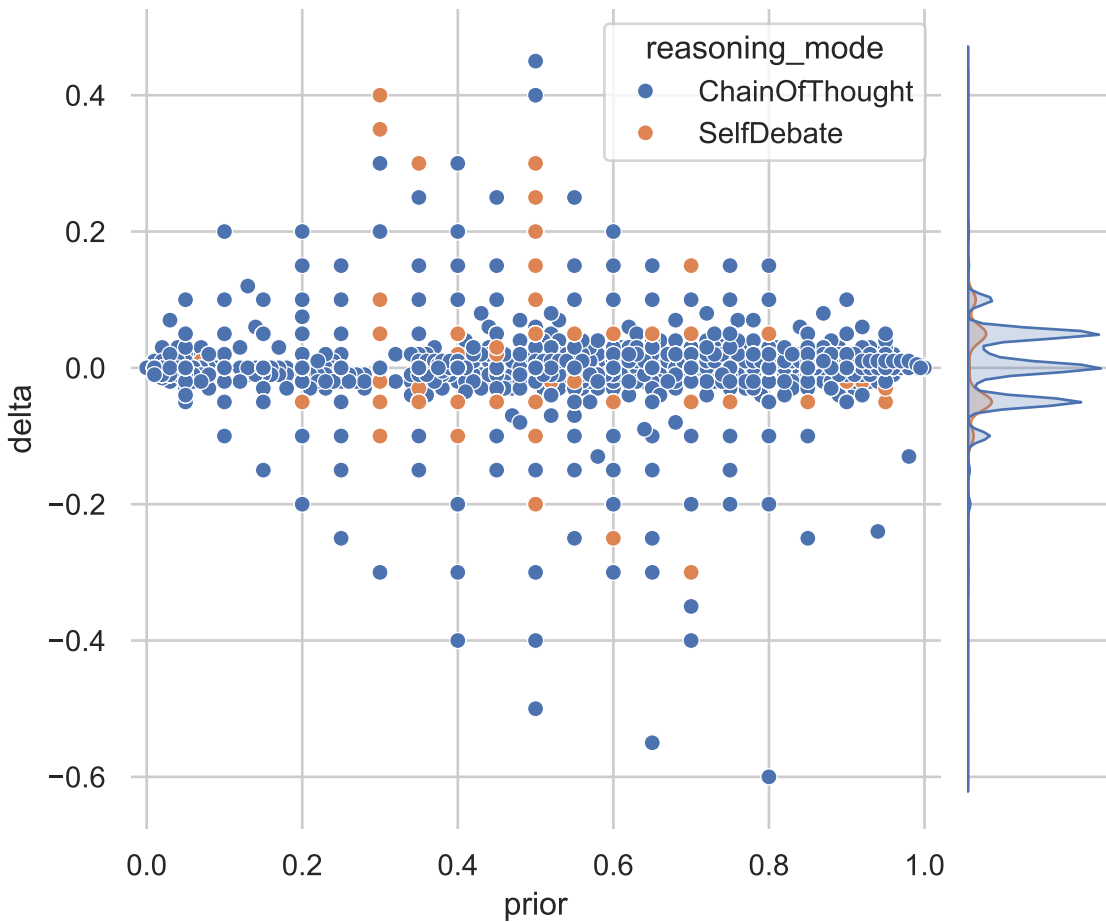

Supplement: supplementary_material [file density_delta_prior_reasoning_mode.pdf › Eval-Reasoning-Consistency-main/data/figures/per_step/density_delta_prior_reasoning_mode.pdf]

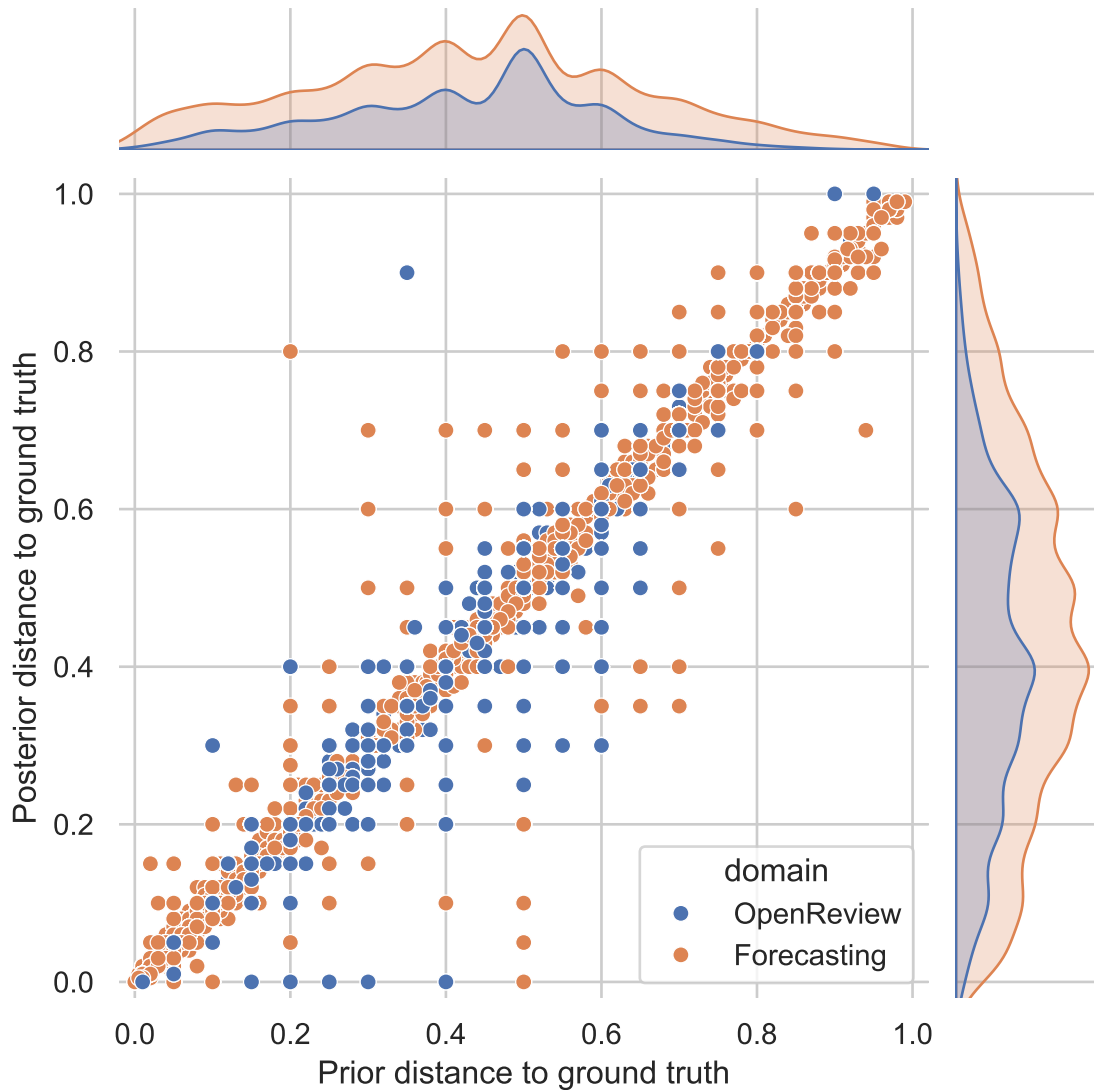

Supplement: supplementary_material [file density_posterior_distance_prior_distance_domain.pdf › Eval-Reasoning-Consistency-main/data/figures/per_step/density_posterior_distance_prior_distance_domain.pdf]

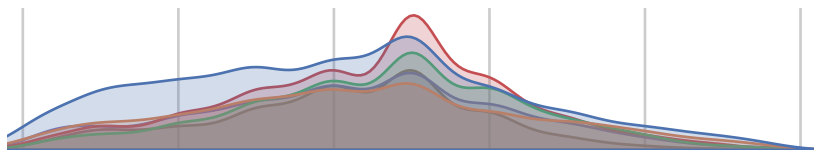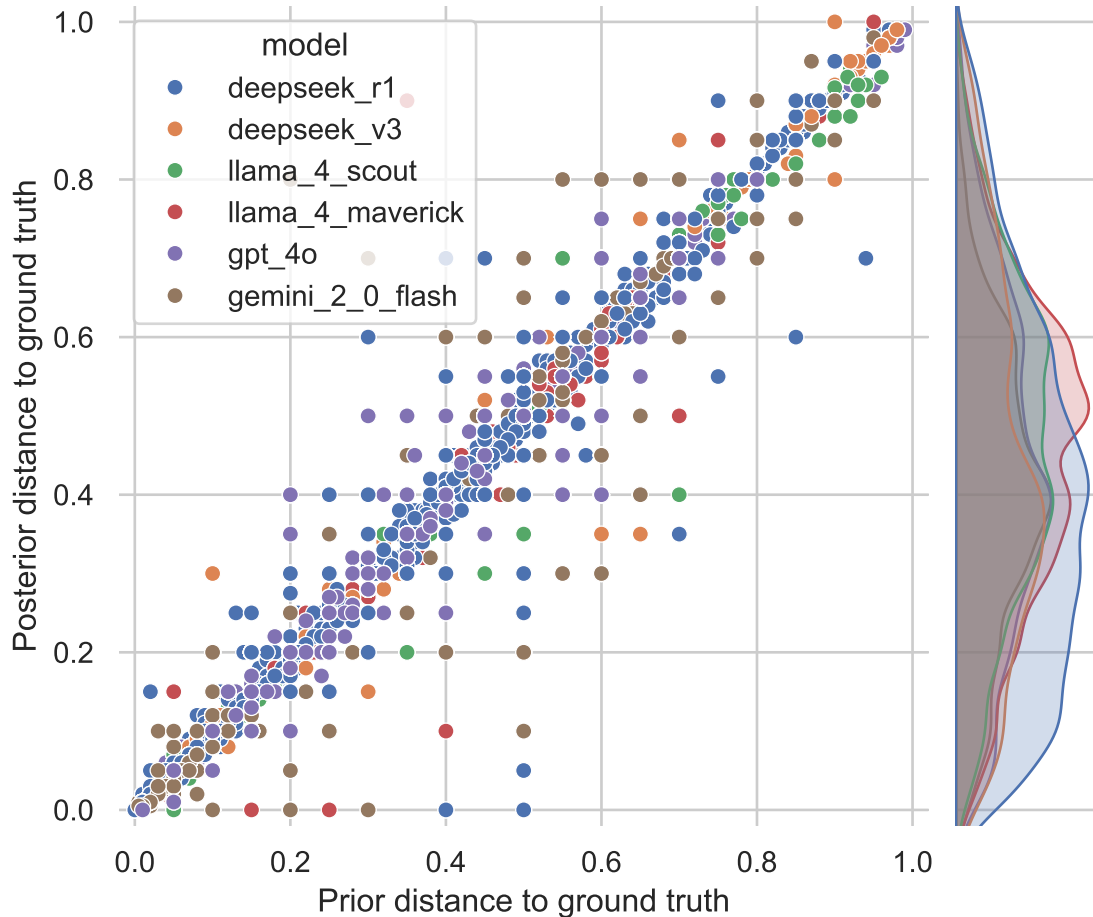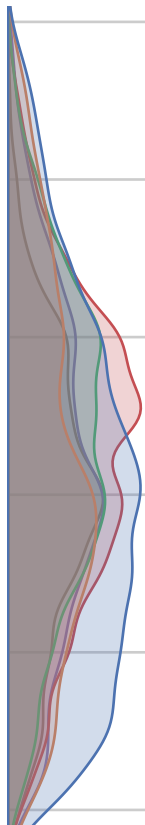

Supplement: supplementary_material [file density_posterior_distance_prior_distance_model.pdf › Eval-Reasoning-Consistency-main/data/figures/per_step/density_posterior_distance_prior_distance_model.pdf]

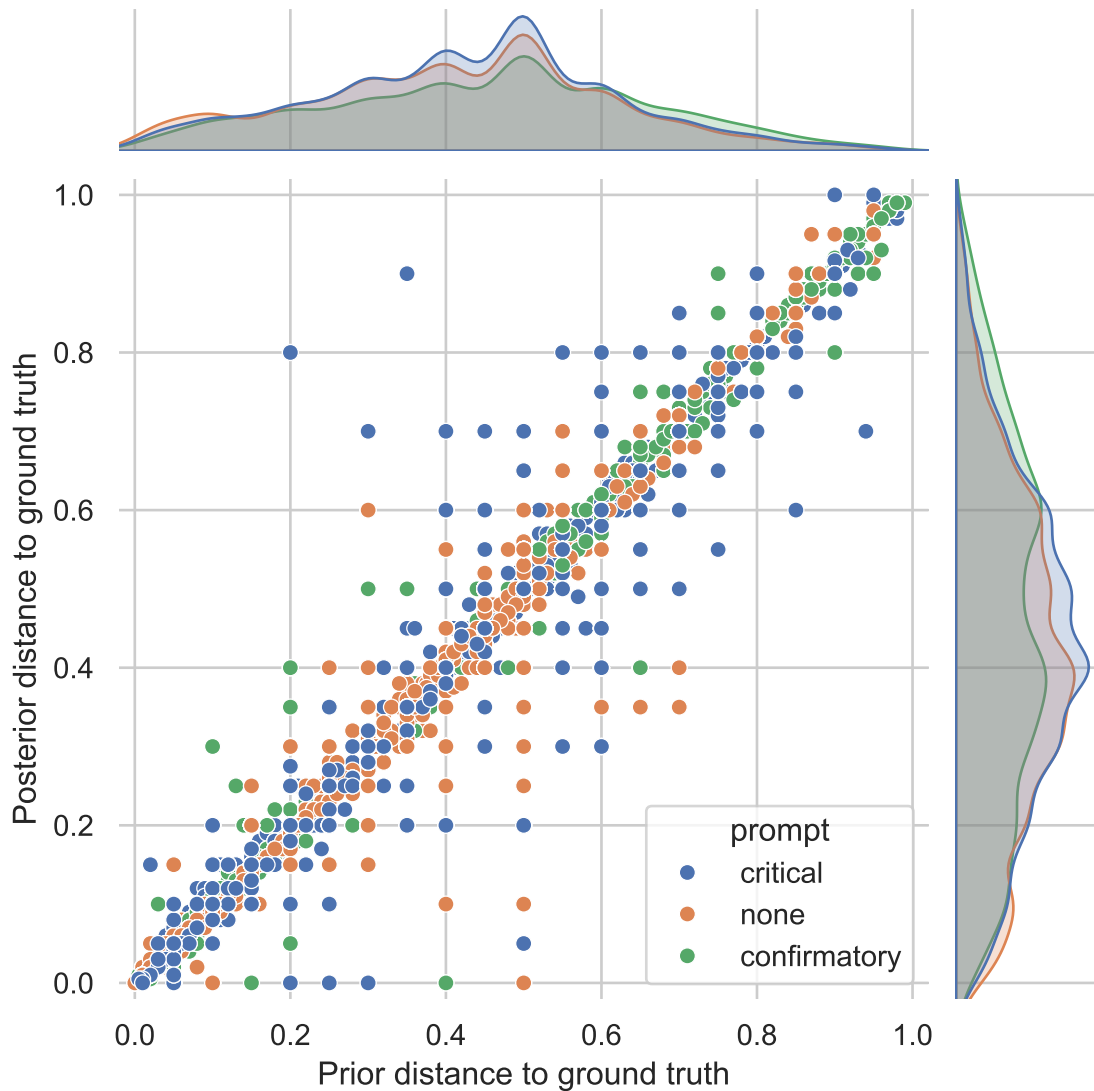

Supplement: supplementary_material [file density_posterior_distance_prior_distance_prompt.pdf › Eval-Reasoning-Consistency-main/data/figures/per_step/density_posterior_distance_prior_distance_prompt.pdf]

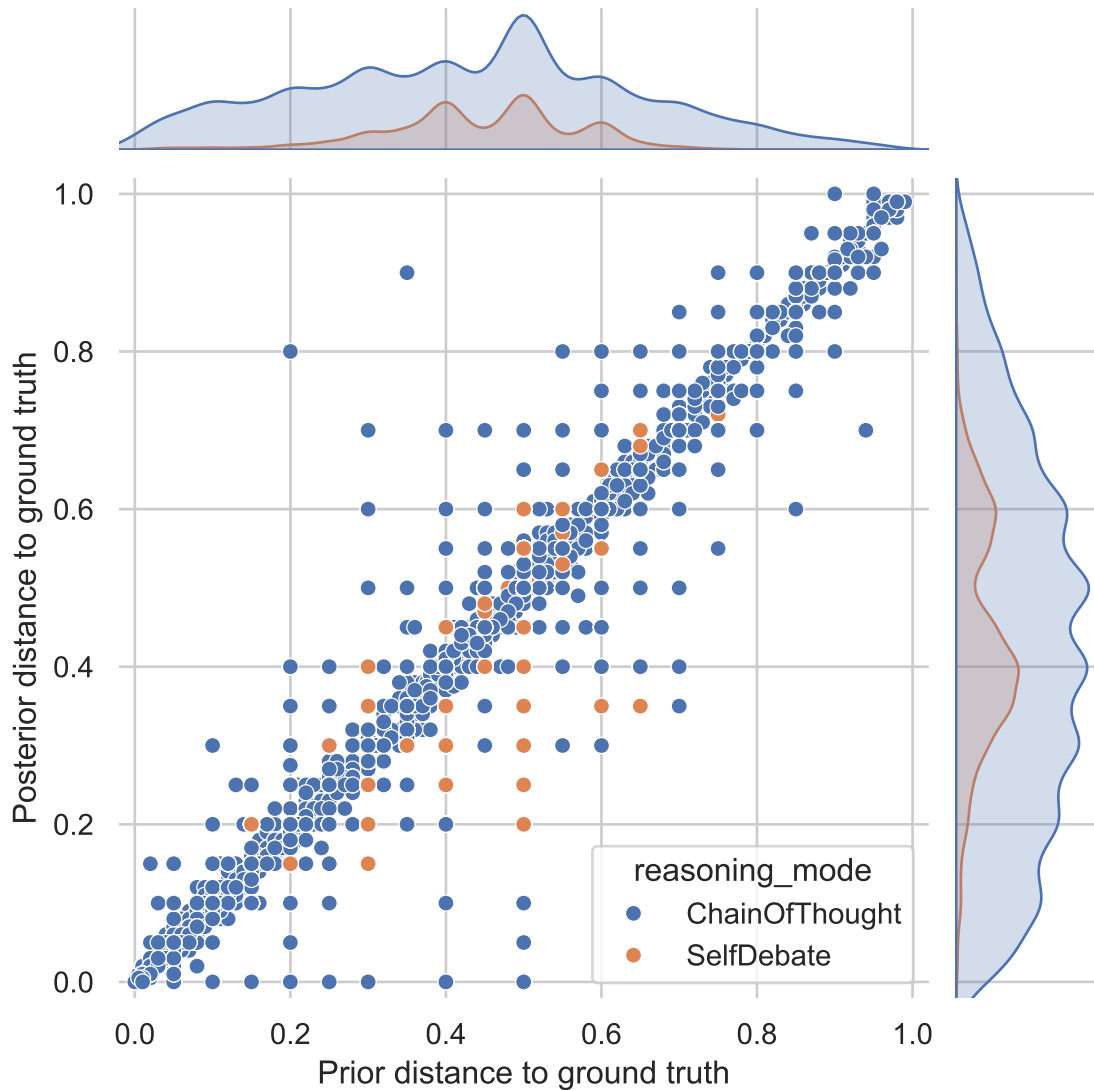

Supplement: supplementary_material [file density_posterior_distance_prior_distance_reasoning_mode.pdf › Eval-Reasoning-Consistency-main/data/figures/per_step/density_posterior_distance_prior_distance_reasoning_mode.pdf]

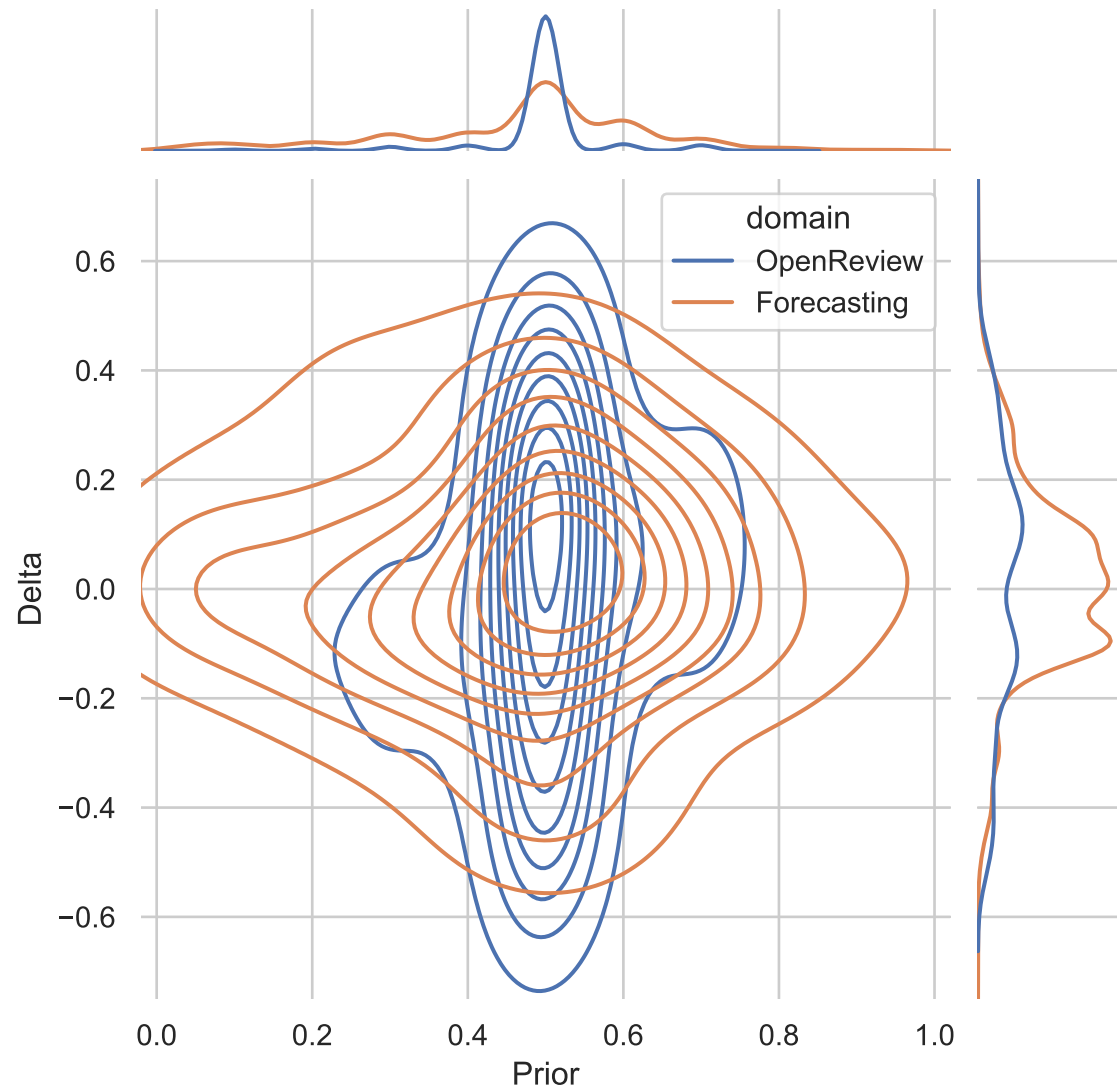

Supplement: supplementary_material [file density_delta_prior_domain.pdf › Eval-Reasoning-Consistency-main/data/figures/per_traj/density_delta_prior_domain.pdf]

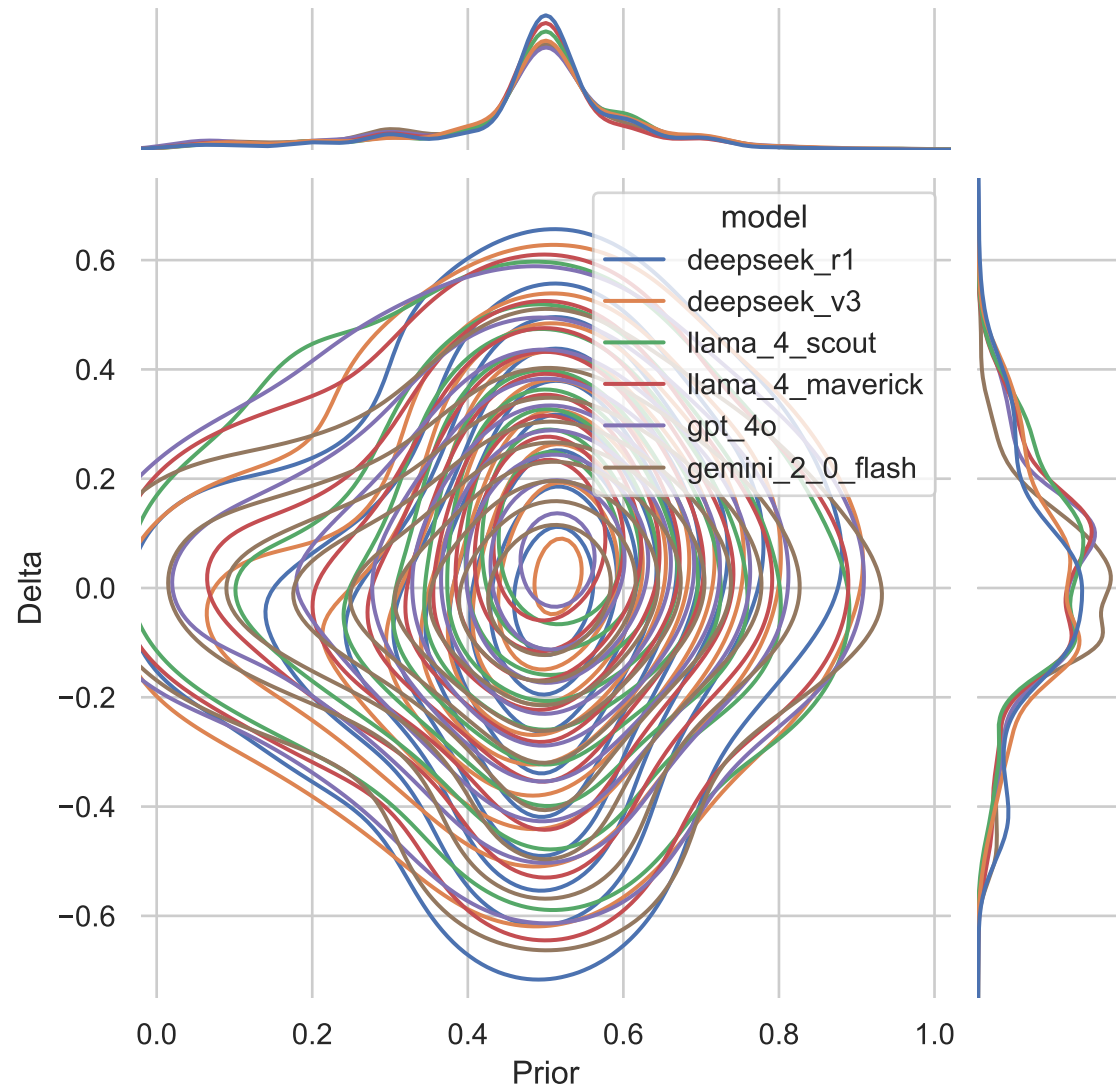

Supplement: supplementary_material [file density_delta_prior_model.pdf › Eval-Reasoning-Consistency-main/data/figures/per_traj/density_delta_prior_model.pdf]

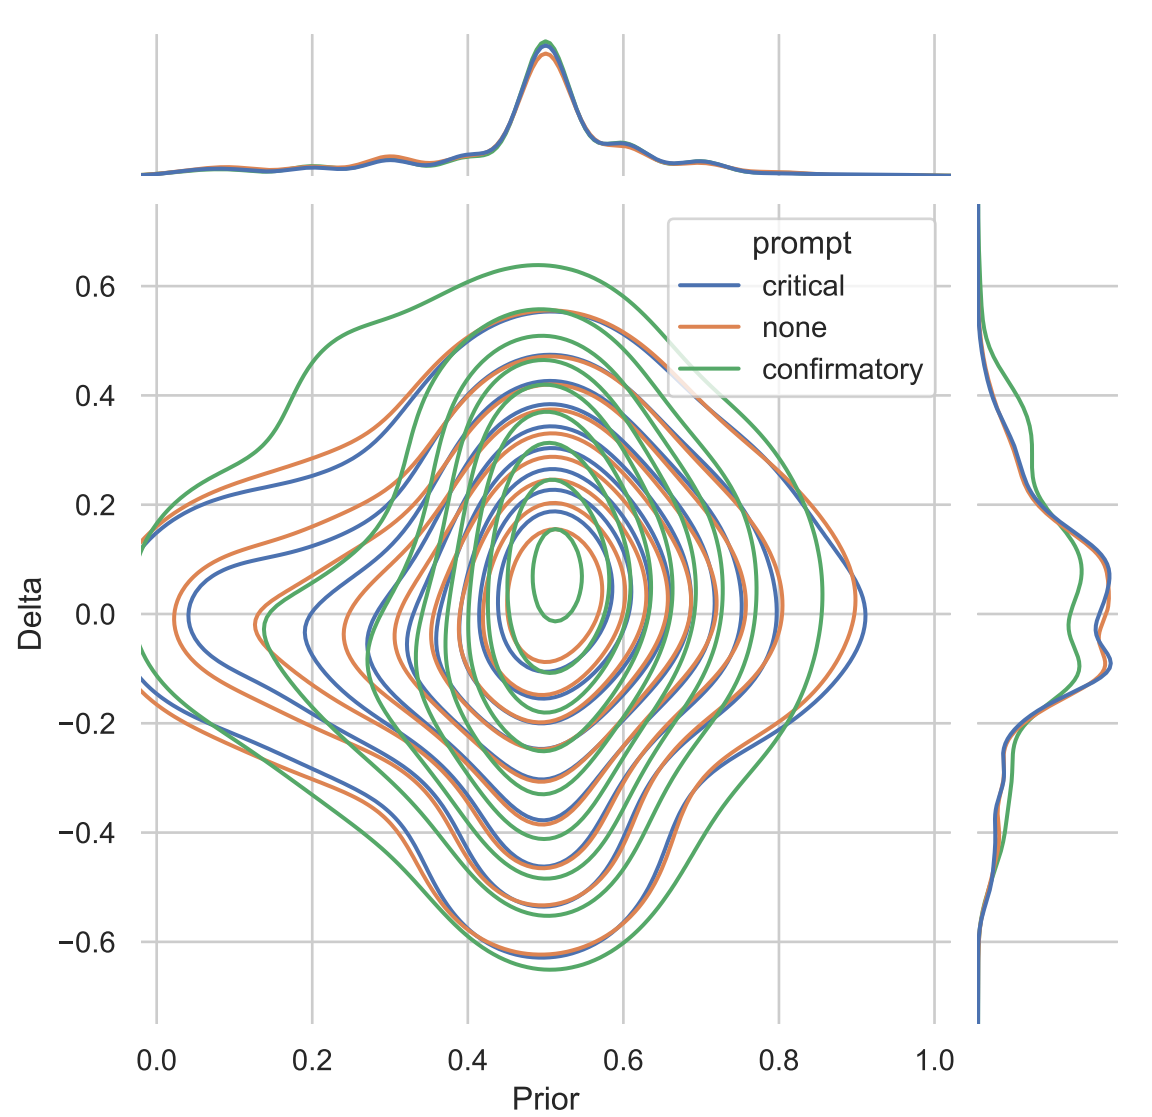

Supplement: supplementary_material [file density_delta_prior_prompt.pdf › Eval-Reasoning-Consistency-main/data/figures/per_traj/density_delta_prior_prompt.pdf]

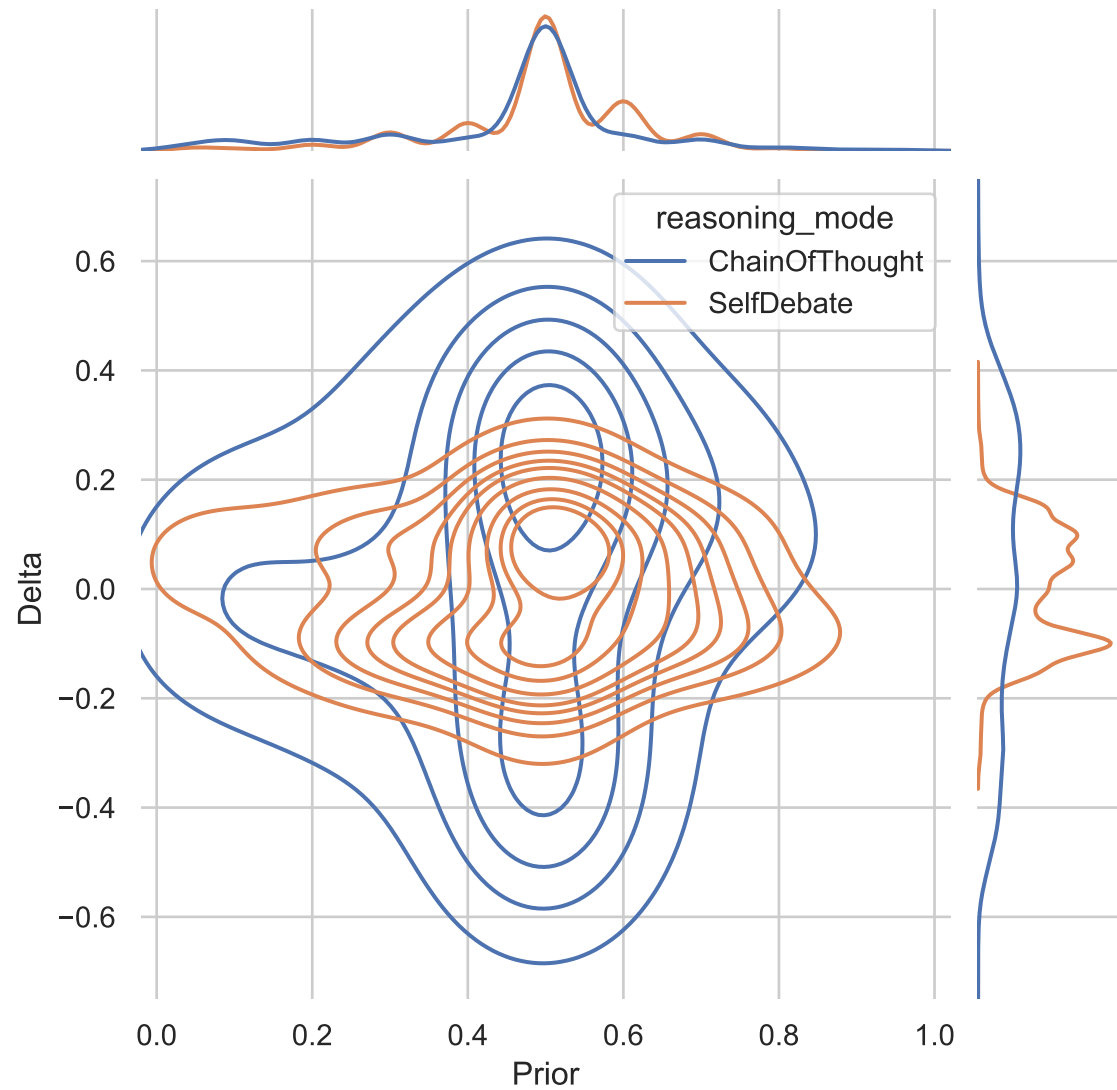

Supplement: supplementary_material [file density_delta_prior_reasoning_mode.pdf › Eval-Reasoning-Consistency-main/data/figures/per_traj/density_delta_prior_reasoning_mode.pdf]

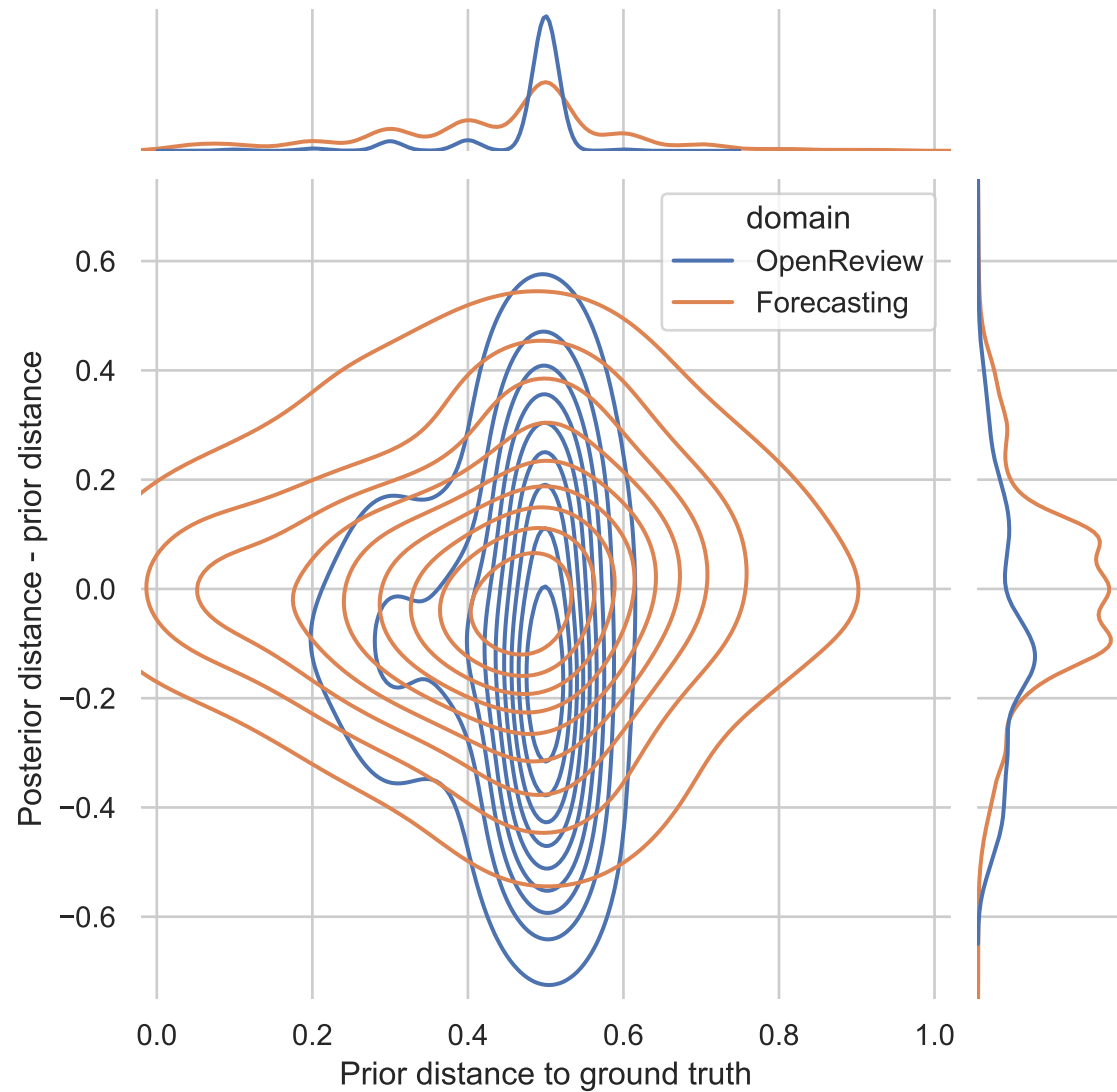

Supplement: supplementary_material [file density_posterior_distance_delta_prior_distance_domain.pdf › Eval-Reasoning-Consistency-main/data/figures/per_traj/density_posterior_distance_delta_prior_distance_domain.pdf]

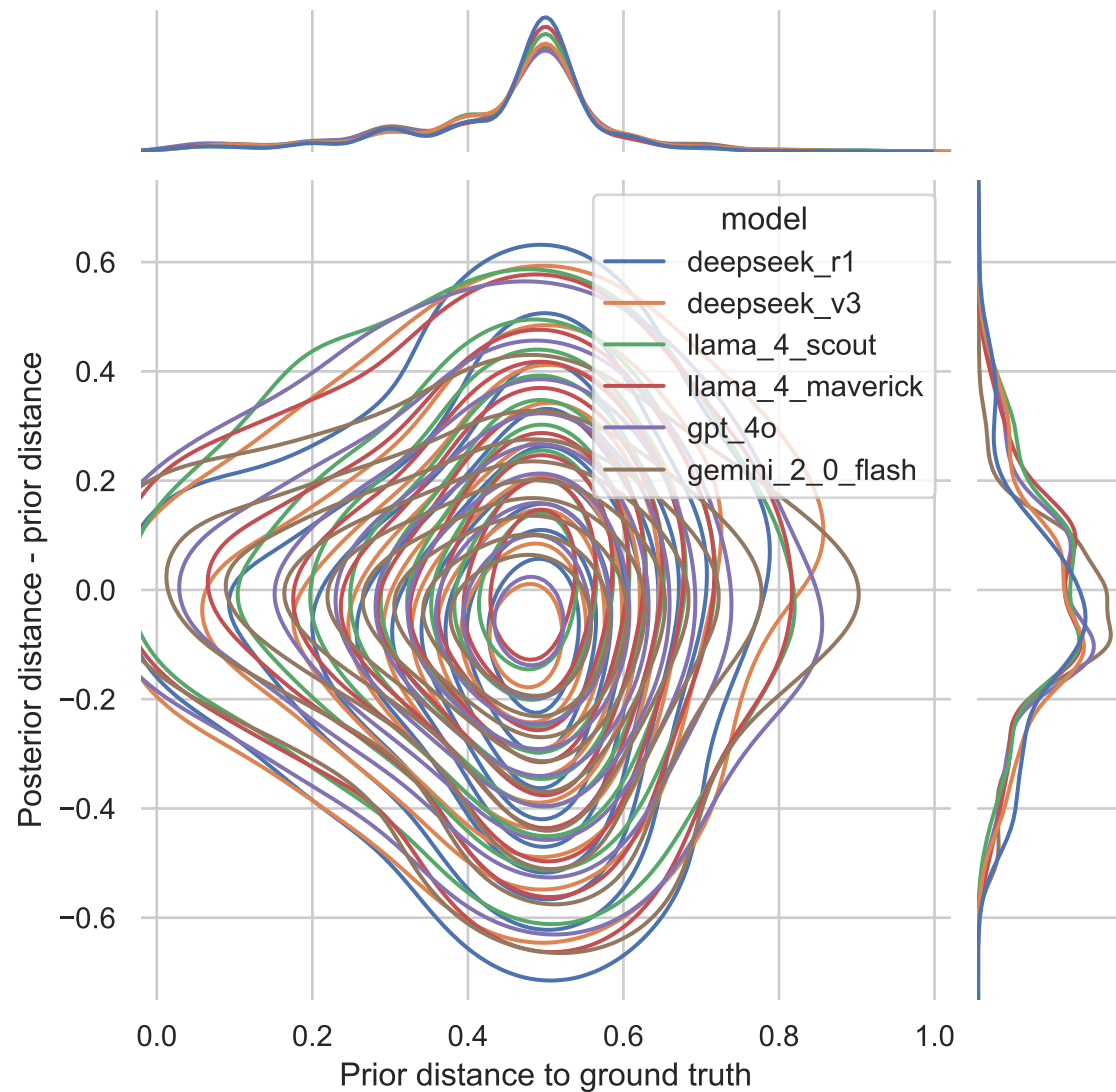

Supplement: supplementary_material [file density_posterior_distance_delta_prior_distance_model.pdf › Eval-Reasoning-Consistency-main/data/figures/per_traj/density_posterior_distance_delta_prior_distance_model.pdf]

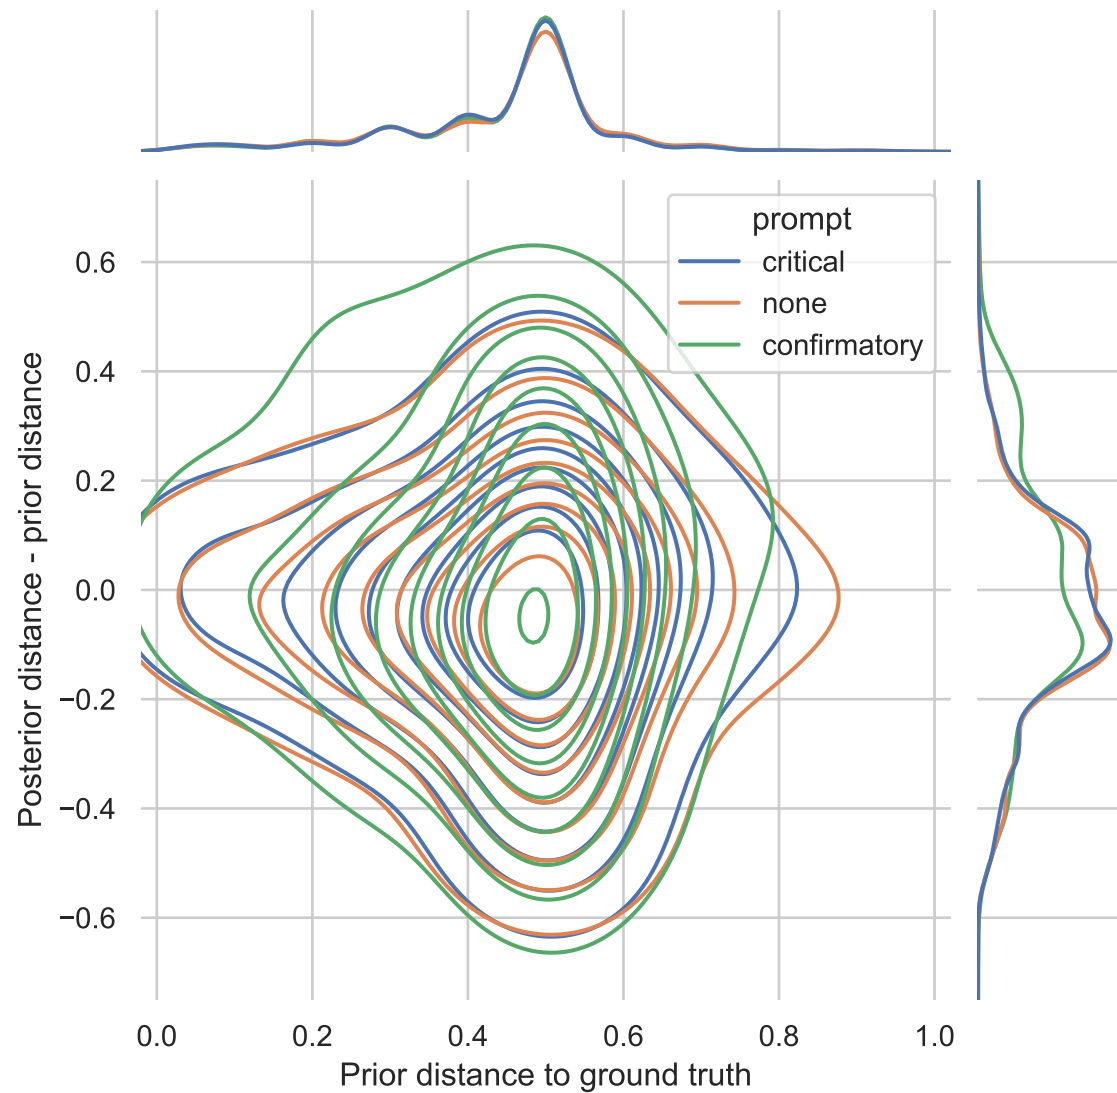

Supplement: supplementary_material [file density_posterior_distance_delta_prior_distance_prompt.pdf › Eval-Reasoning-Consistency-main/data/figures/per_traj/density_posterior_distance_delta_prior_distance_prompt.pdf]

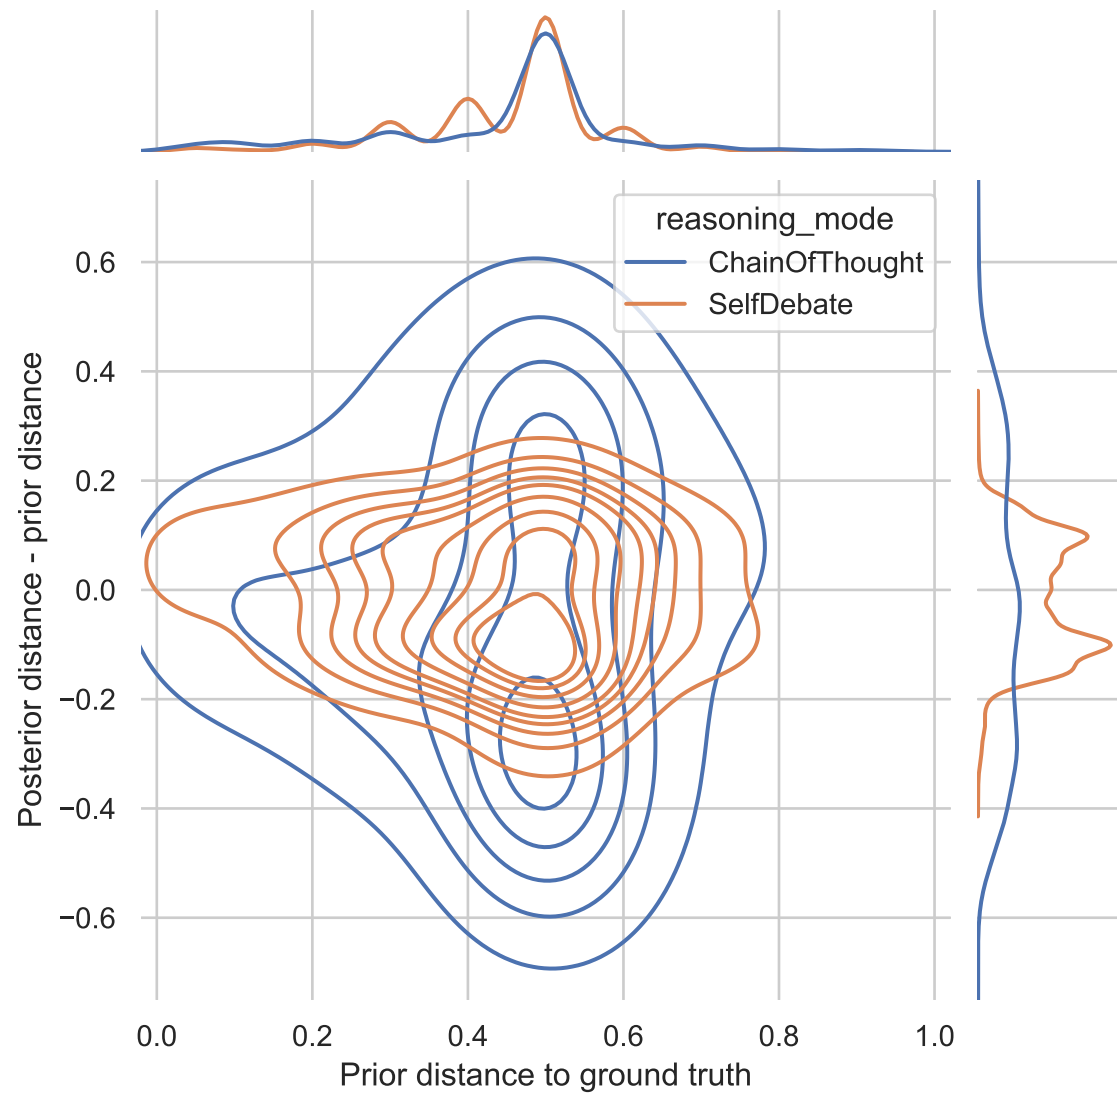

Supplement: supplementary_material [file density_posterior_distance_delta_prior_distance_reasoning_mode.pdf › Eval-Reasoning-Consistency-main/data/figures/per_traj/density_posterior_distance_delta_prior_distance_reasoning_mode.pdf]

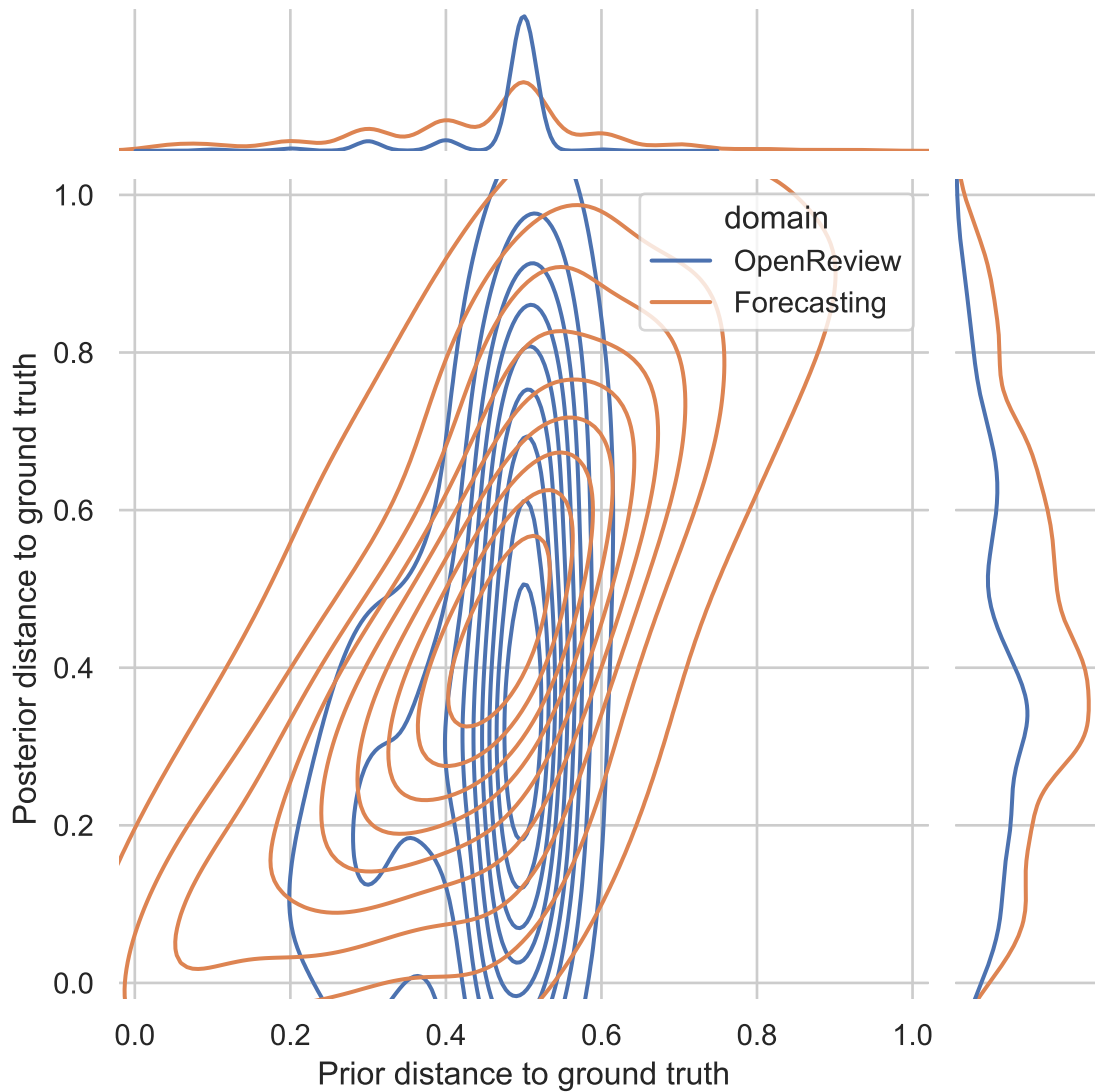

Supplement: supplementary_material [file density_posterior_distance_prior_distance_domain.pdf › Eval-Reasoning-Consistency-main/data/figures/per_traj/density_posterior_distance_prior_distance_domain.pdf]

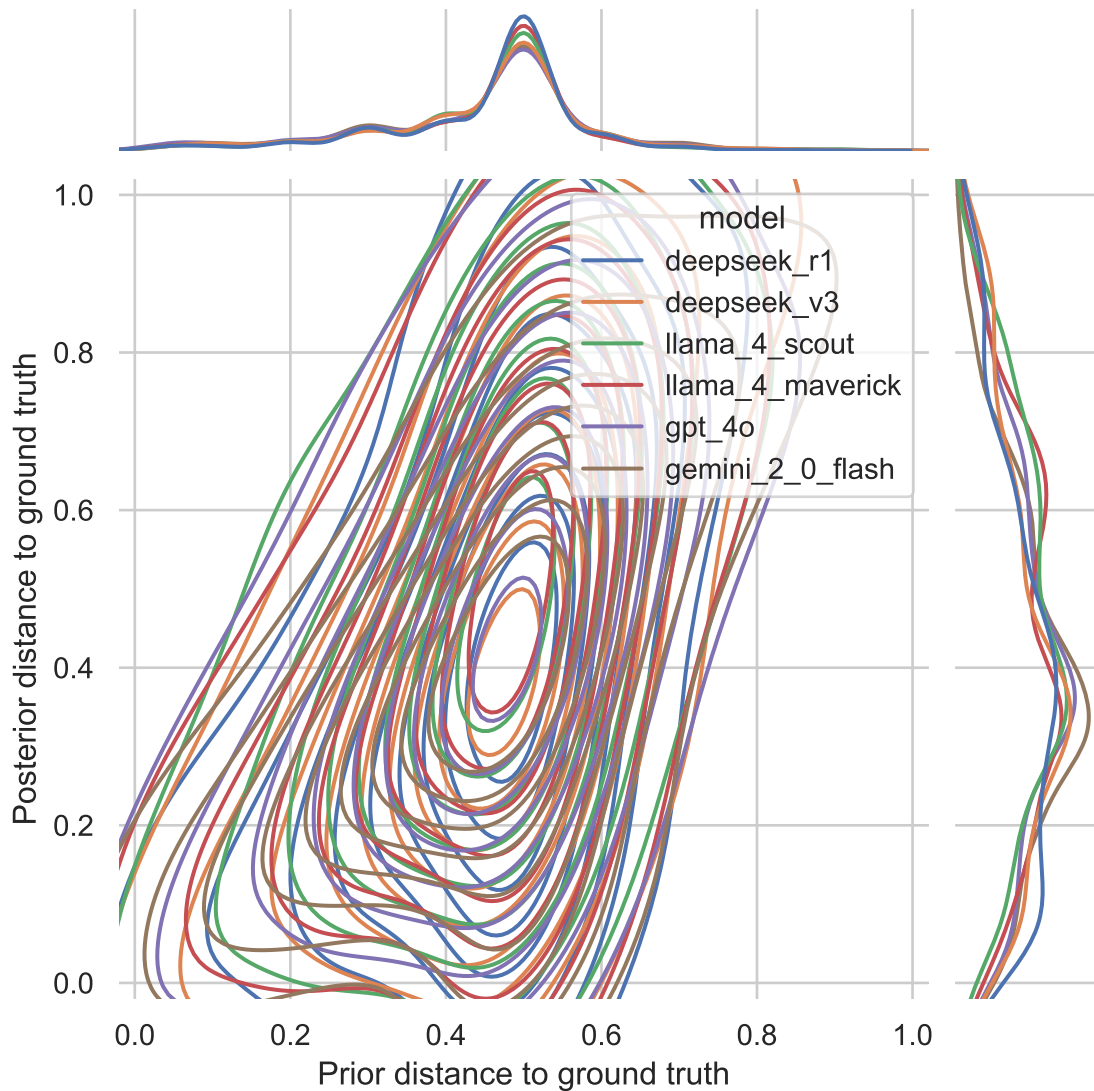

Supplement: supplementary_material [file density_posterior_distance_prior_distance_model.pdf › Eval-Reasoning-Consistency-main/data/figures/per_traj/density_posterior_distance_prior_distance_model.pdf]

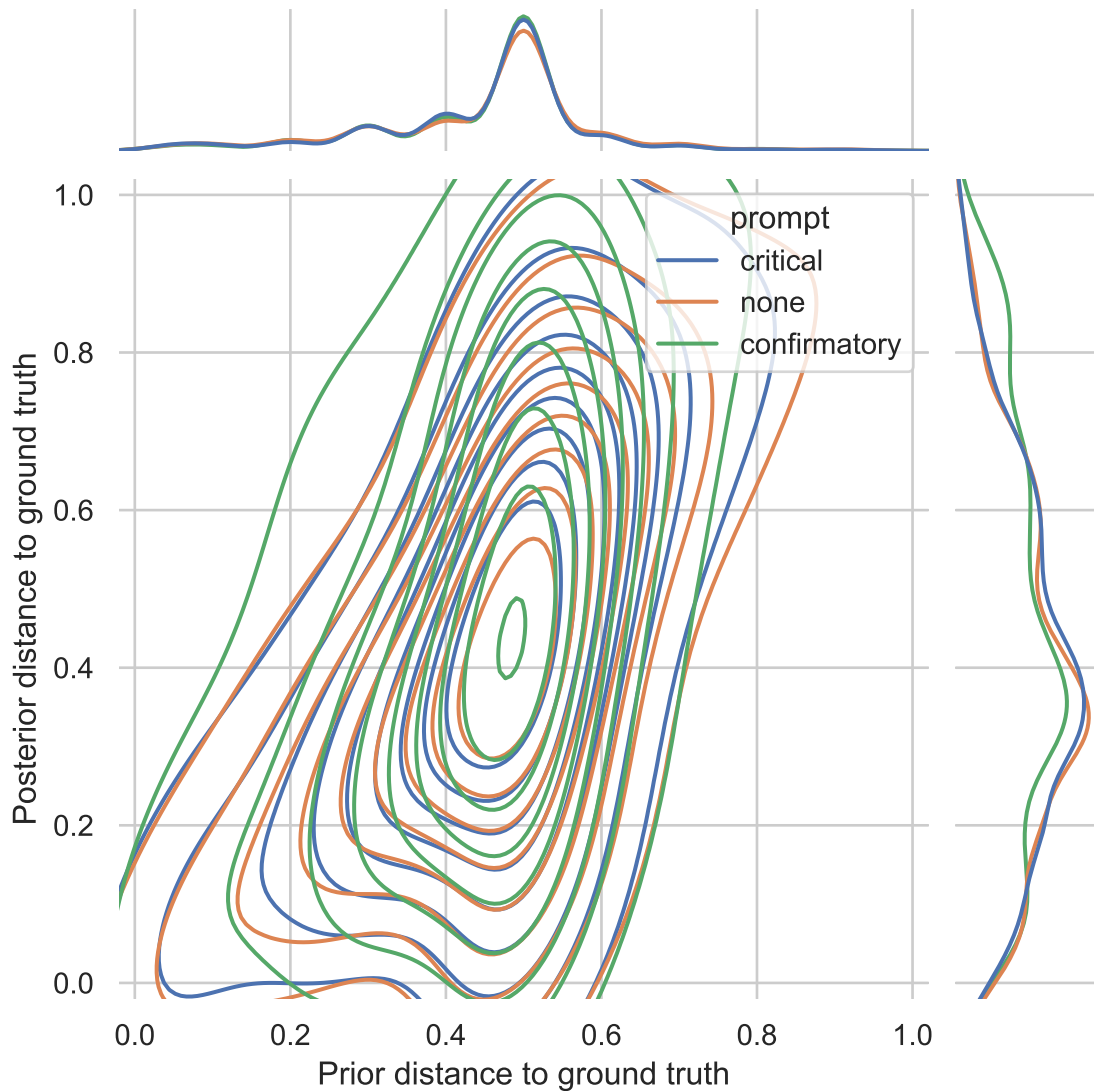

Supplement: supplementary_material [file density_posterior_distance_prior_distance_prompt.pdf › Eval-Reasoning-Consistency-main/data/figures/per_traj/density_posterior_distance_prior_distance_prompt.pdf]

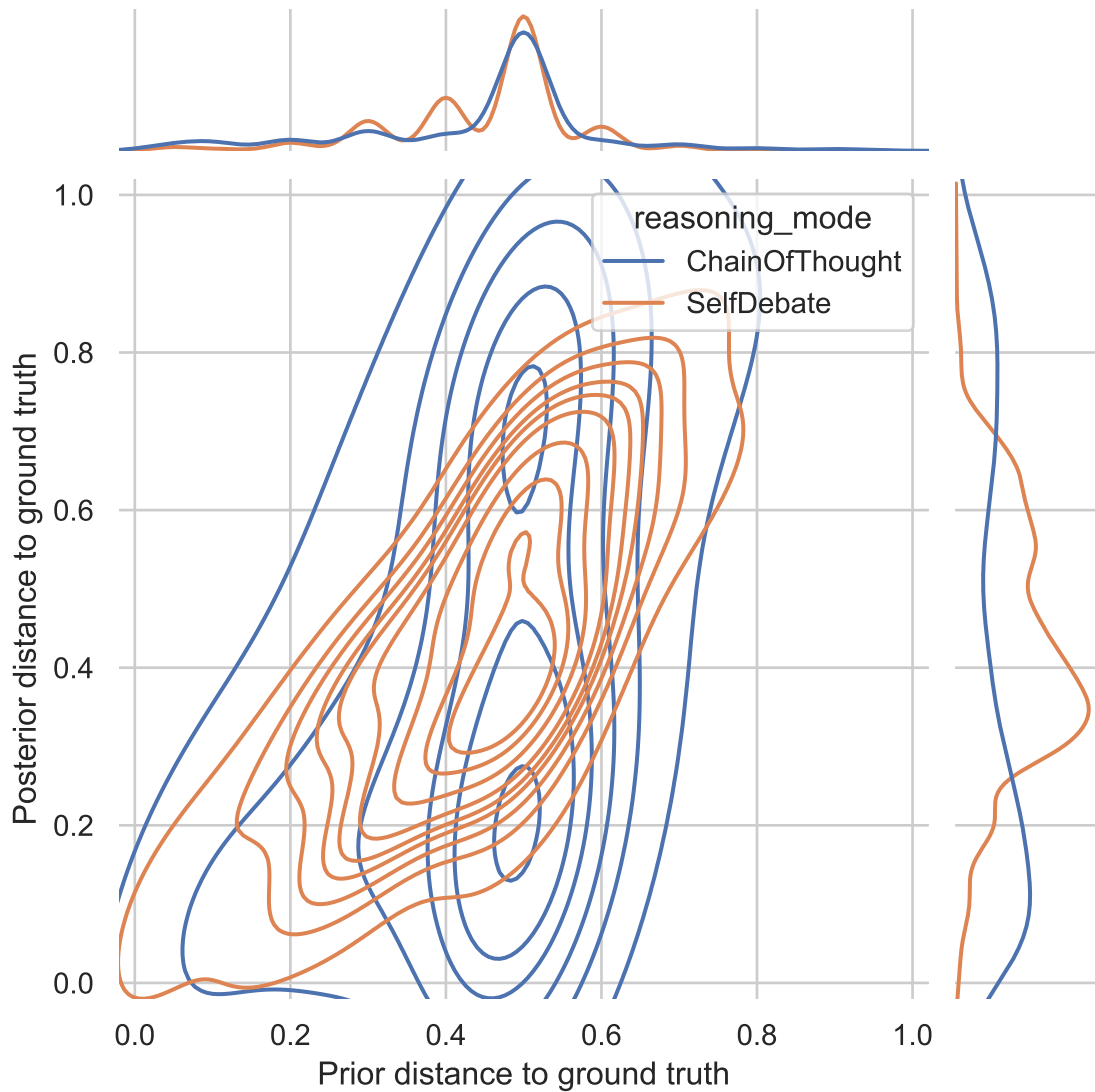

Supplement: supplementary_material [file density_posterior_distance_prior_distance_reasoning_mode.pdf › Eval-Reasoning-Consistency-main/data/figures/per_traj/density_posterior_distance_prior_distance_reasoning_mode.pdf]
